# Supplementary material for: Changes in neighborhood air quality after idling of an urban oil production site
Source: Royal Society of Chemistry journal article supplement (doi:10.1039/d1em00048a), 2021-01-01
Supplement: d1em00048a1.pdf [file d1em00048a1.pdf]

Changes in neighborhood air quality after idling of an urban oil production site

Jill E. Johnston<sup>1\*</sup>, Kristen Okorn<sup>2</sup>, Yoshira Ornelas Van Horne<sup>1</sup>, Amanda Jimenez<sup>1</sup>

**SUPPLEMENTAL INFORMATION**

*Table S1: Concentrations of minute-averaged methane and non-methane hydrocarbons measured near the AllenCo oil and gas development site in North University Park neighborhood in Los Angeles, California with negative measurements in Phase 3 included.*

| Dates                  | Phase | Methane (ppm) |                     |               | NMHC (ppm) |                     |                  |
|------------------------|-------|---------------|---------------------|---------------|------------|---------------------|------------------|
|                        |       | Mean          | Median[25th, 75th]  | Range         | Mean       | Median[25th, 75th]  | Range            |
| 10/4/2013 - 11/21/2013 | 1     | 2.547         | 2.246 [2.05, 2.685] | 1.712 - 110   | 0.714      | 0.197[0.069, 0.497] | 0 - 219.1        |
| 11/22/2013 - 1/31/2014 | 2     | 2.157         | 2.092 [1.743, 2.46] | 0 - 54.280    | 0.376      | 0.254[0.137, 0.477] | 0 - 184.6        |
| 2/1/2014 - 3/18/2014   | 3     | 1.599         | 1.473[1.38, 1.668]  | 1.158 - 6.094 | 0.236      | 0.137[0.04, 0.299]  | (-10.97 - 35.55) |

**Table S2.** Summary of PMF and error estimation diagnostics by run for VOC data.

| Diagnostic                         | 5 factors      | 6 factors      | 7 factors               | 8 factors               |
|------------------------------------|----------------|----------------|-------------------------|-------------------------|
| Q expected                         | 1331.0         | 1196.0         | 1061.0                  | 926.0                   |
| Q true                             | 2374.5         | 1824.4         | 1404.8                  | 1097.3                  |
| Q robust                           | 2223.8         | 1728.7         | 1322.0                  | 1016.9                  |
| DISP %dQ                           | <0.01%         | <0.01%         | <0.01%                  | 0.10%                   |
| DISP swaps                         | 0              | 0              | 0                       | 0                       |
| Factors with the lowest BS mapping | Factor MVE 80% | Factor MVE 99% | Industrial solvents 80% | Industrial solvents 82% |

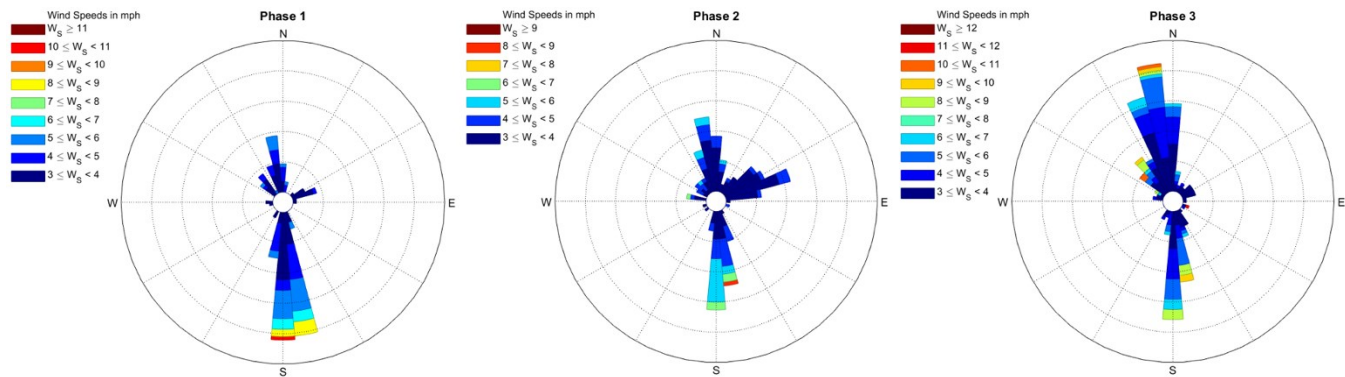

Figure S1: Wind Rose for each of the phases of the analysis. Data from meteorological stations at University of Southern California University Park Campus.

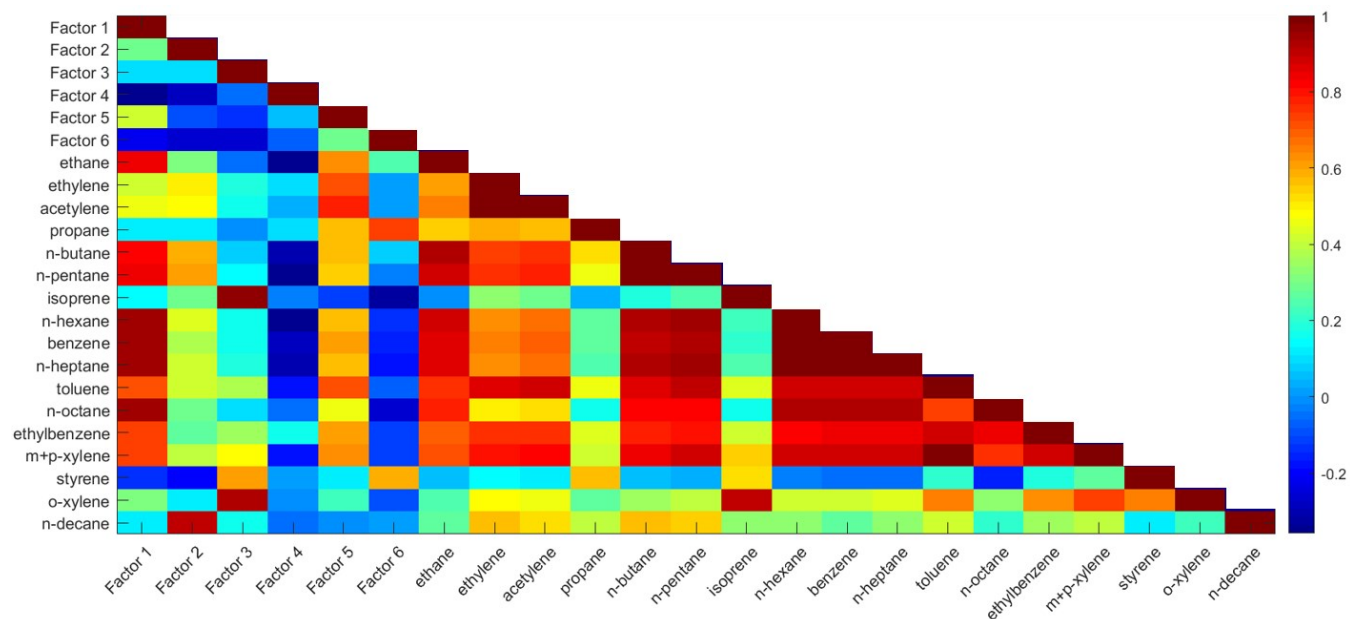

Figure S2: Pearson correlation matrix of passive canister samples during the active phase. Factors shown are resolved from the PMF.

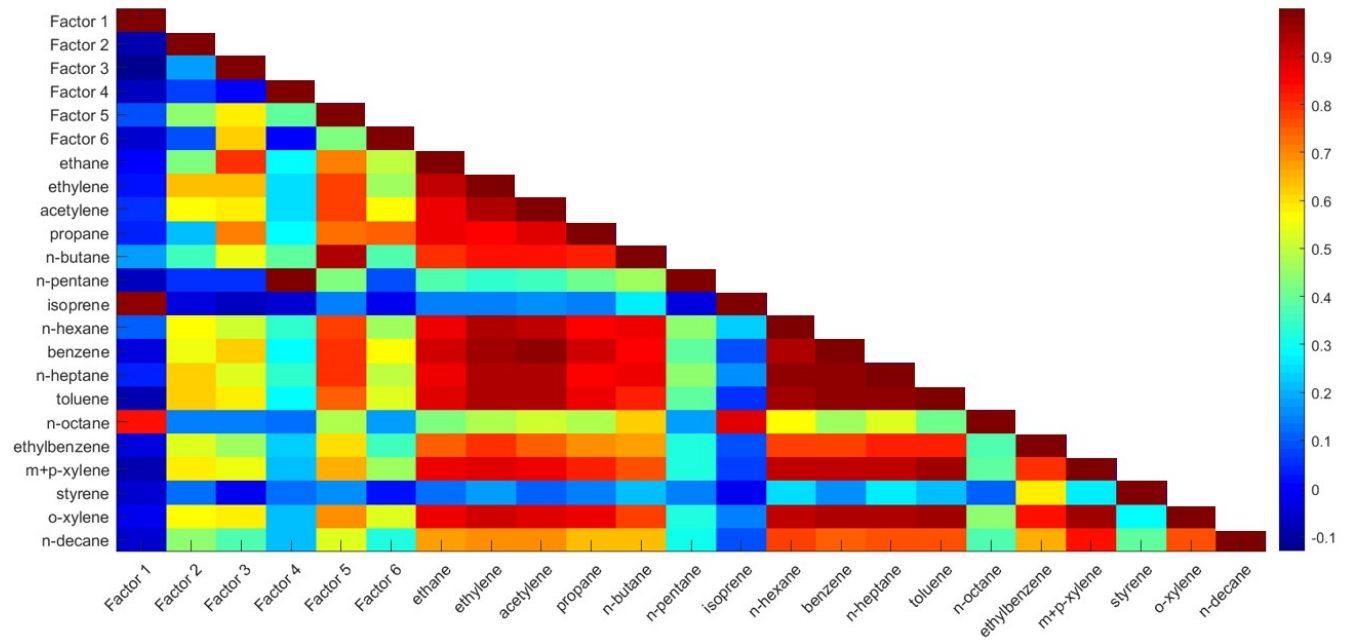

Figure S3: Pearson correlation of passive canister samples during the idle phase. Factors shown are resolved from the PMF.

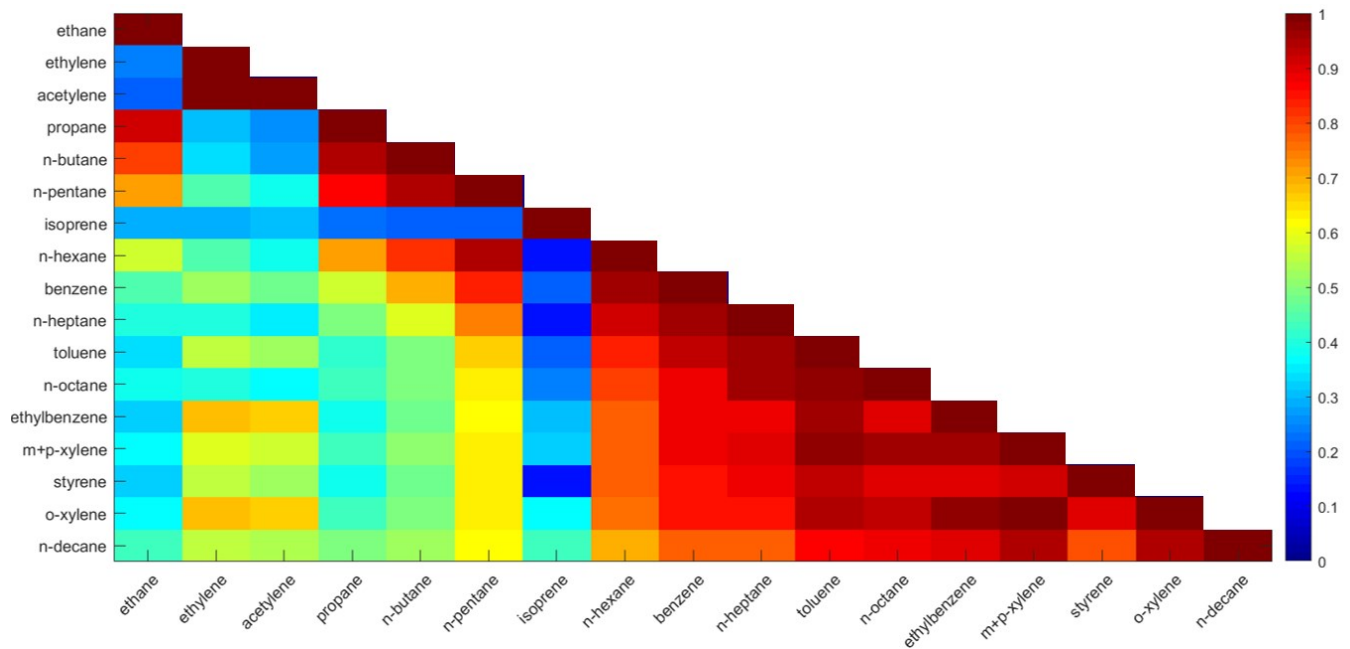

Figure S4: Pearson correlation matrix of triggered canister samples during the active phase.
